# Supplementary material
Source: PubMed Central journal article supplement (PMC4752902)

**A** CD19 synNotch → Meso CAR

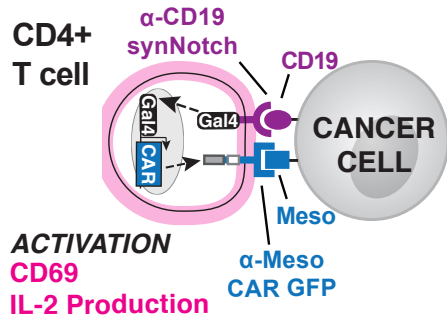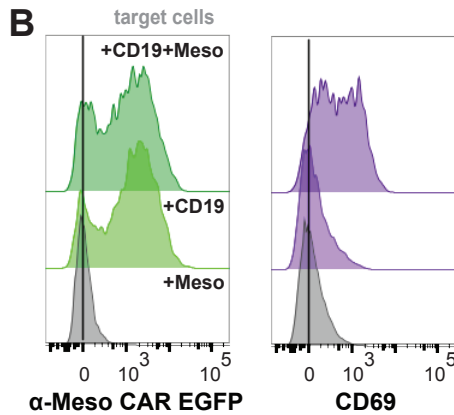

**C** IL-2 Production (24 hrs.)

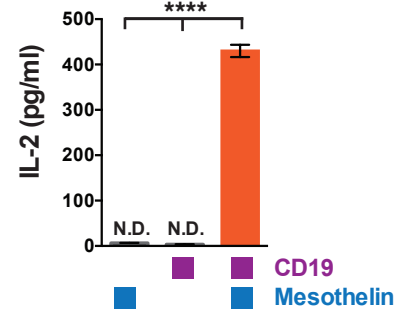

**D** CD19 synNotch → Meso CAR

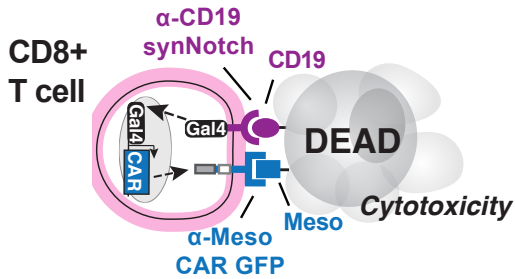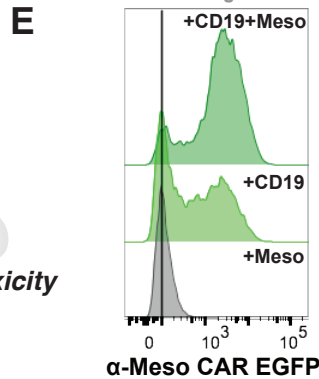

**F** Cancer Cell Killing

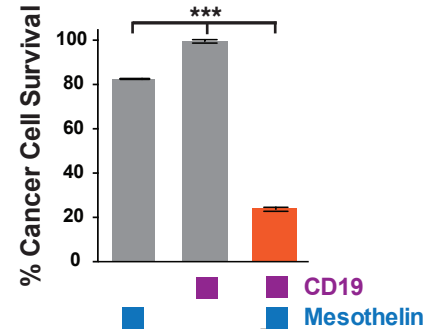

1:1 T cell to Target Ratio - 24 hrs.

**G** GFP synNotch → Meso CAR

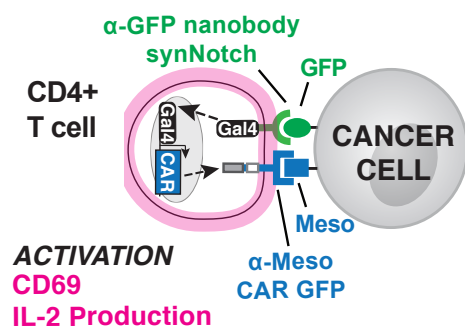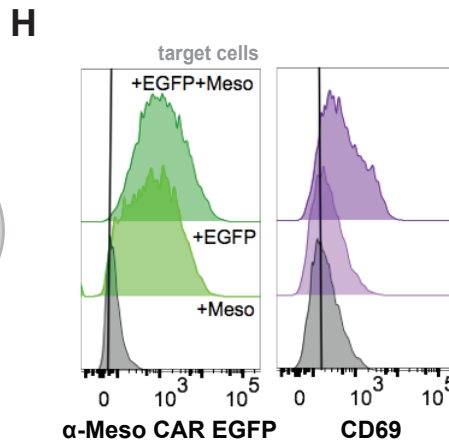

**I** IL-2 Production (24 hrs.)

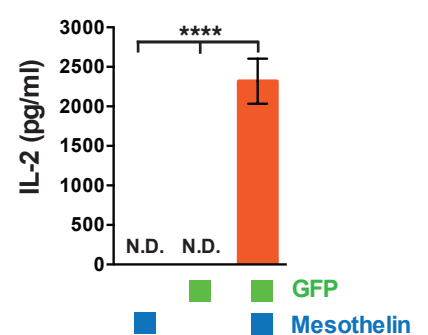

Supplement: NIHMS751435-supplement-4.pdf [file NIHMS751435-supplement-4.pdf]
