# Supplementary material
Source: PubMed Central journal article supplement (PMC4752902)

**A**

**$\alpha$ -GFP (LaG17) synNotch Gal4VP64 T cells  
with 5xGal4UAS  $\alpha$ -CD19 CAR IRES Fluc PGK mCherry**

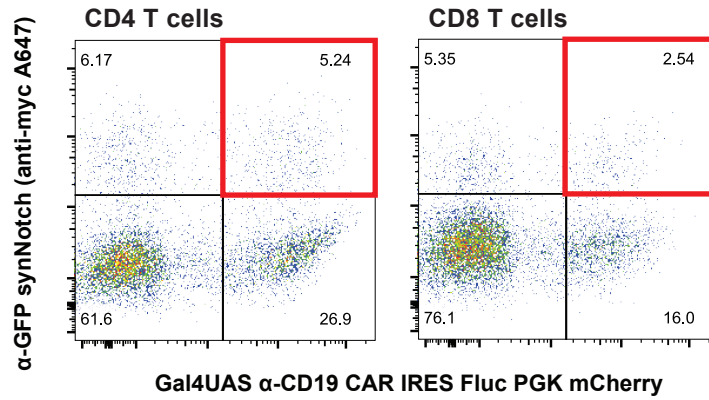**B**

***In vitro* Stimulation of synNotch  
AND Gate T cells Shows Selective Luciferase  
Expression Upon Exposure to Surface GFP**

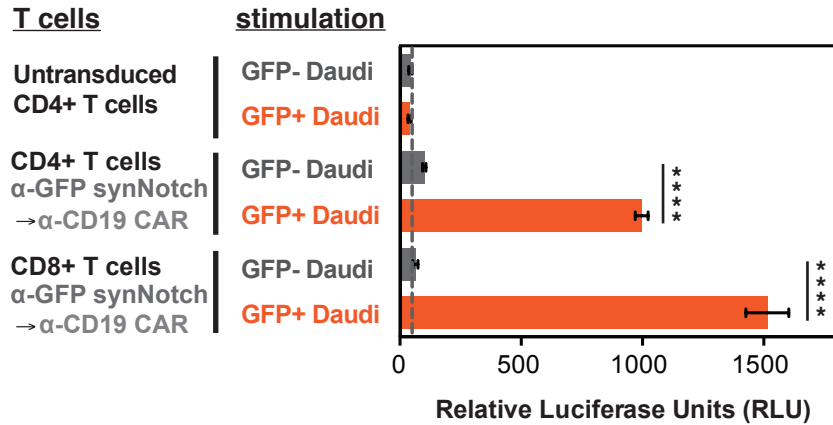**C**

**Daudi Tumor Growth in  
synNotch AND Gate T cell Treated Mice**

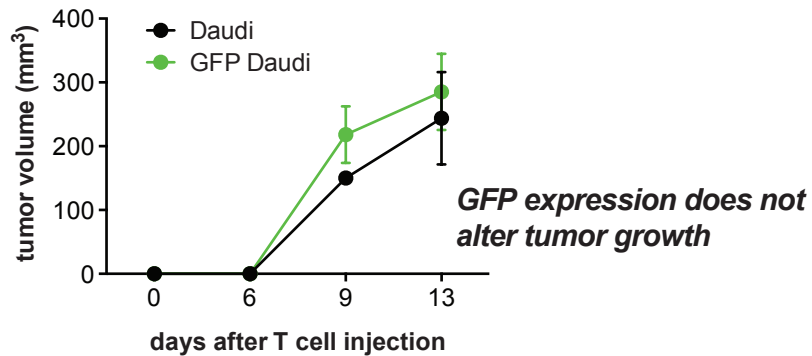

Supplement: NIHMS751435-supplement-5.pdf [file NIHMS751435-supplement-5.pdf]
