# Supplementary material
Source: PubMed Central journal article supplement (PMC4752902)

**A****Dynamics of CAR expression in dual receptor circuit**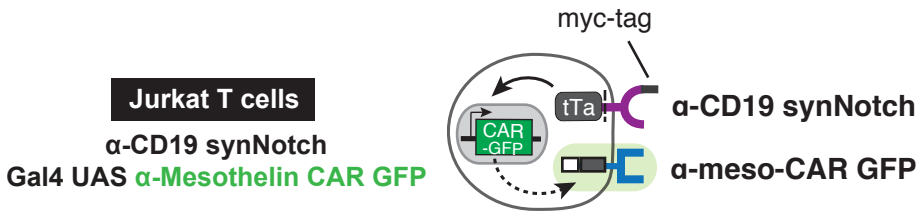**B****CAR Expression**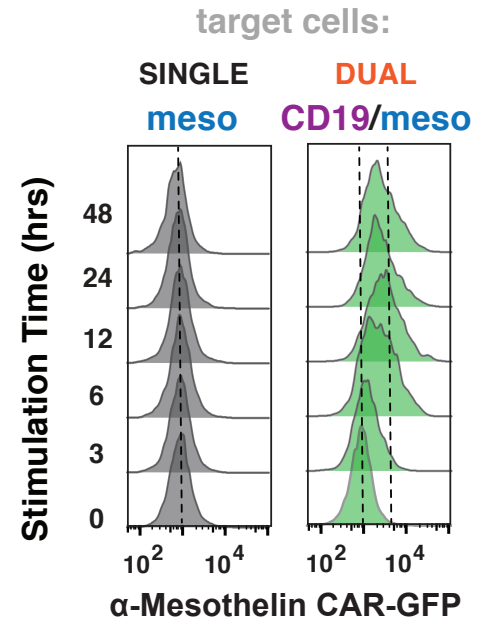**C****CAR Expression Decay**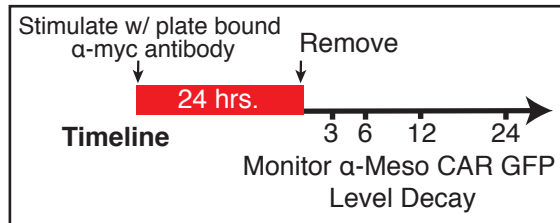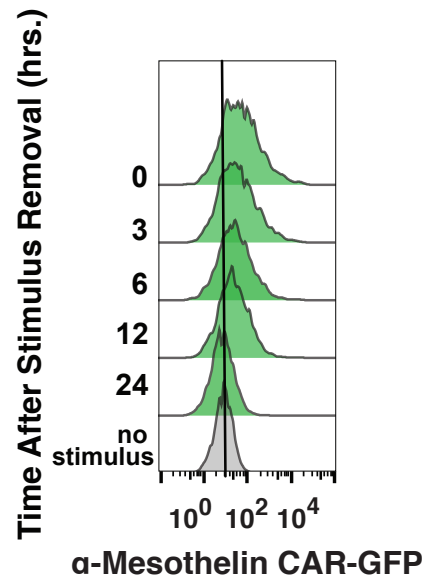

Supplement: NIHMS751435-supplement-3.pdf [file NIHMS751435-supplement-3.pdf]

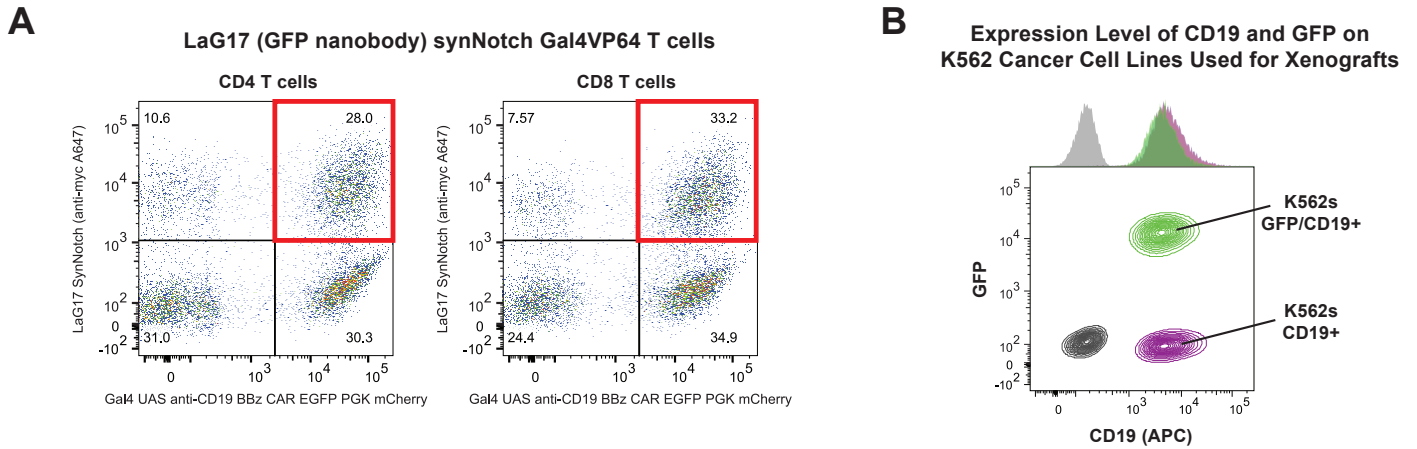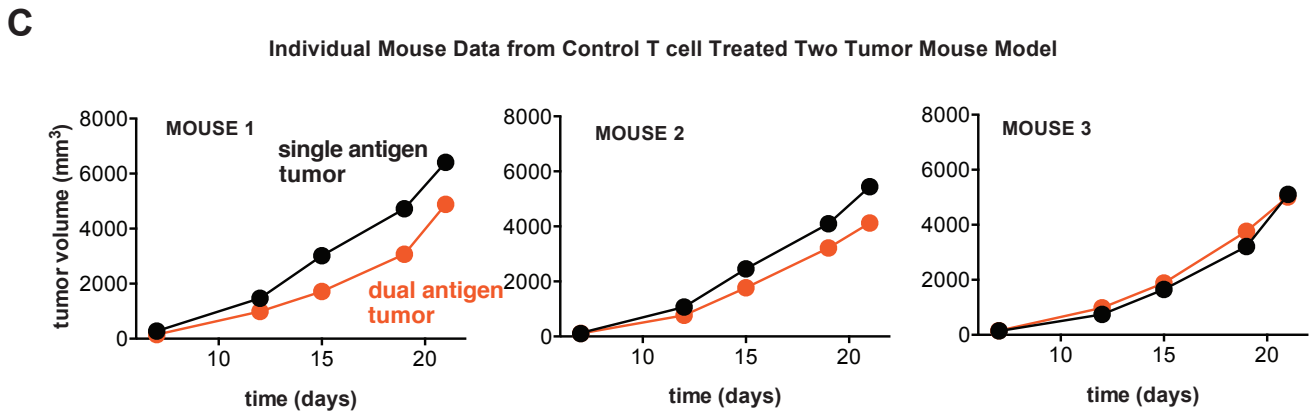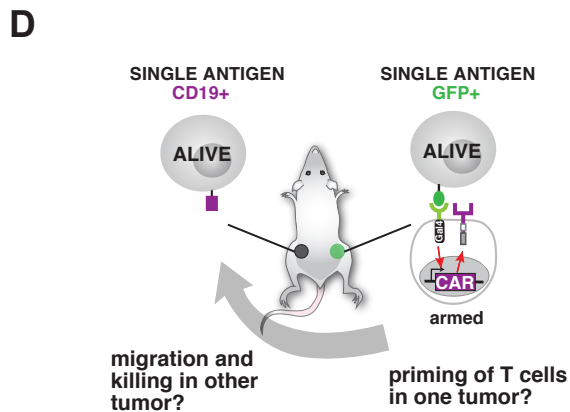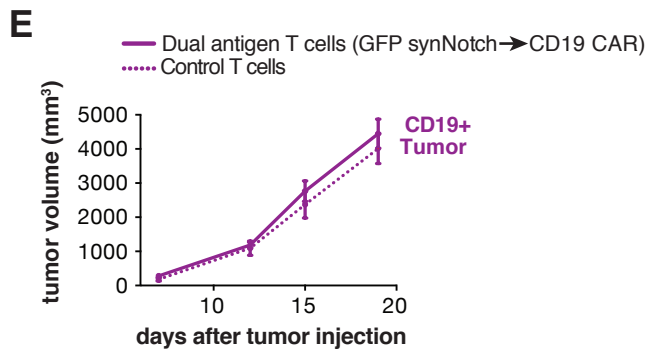

presence of GFP+ (single antigen) tumor does NOT prime T cells to kill CD19+ (single antigen) tumor

Supplement: NIHMS751435-supplement-6.pdf [file NIHMS751435-supplement-6.pdf]
